# Supplementary material
Source: publisher figshare collection journal article supplement (https://acs.figshare.com/ndownloader/files/15326774)
Supplement: Supplementary file 1 [file 15326774]

## Supporting Information

# In Situ Observation of the Formation of Fibrous Sulfur under High Pressure

*Kaiyuan Shi,<sup>1,†</sup> Bing Liu,<sup>2,†</sup> Yingju Wu,<sup>2,†</sup> Zitai Liang,<sup>2</sup> Xiaoyu Wang,<sup>2</sup> Lei Su,<sup>1,\*</sup> Yanlong Wang,<sup>1</sup> Li Zhang,<sup>1</sup> Guoqiang Yang,<sup>1,\*</sup> Yang Zhang,<sup>2,3</sup> Chenlong Xie,<sup>2</sup> and Zhisheng Zhao,<sup>2,\*</sup>*

*<sup>1</sup> Key Laboratory of Photochemistry, Institute of Chemistry, University of Chinese Academy of Sciences, Chinese Academy of Sciences, Beijing, 100190, China*

*<sup>2</sup> Center for High Pressure Science (CHiPS), State Key Laboratory of Metastable Materials Science and Technology, Yanshan University, Qinhuangdao 066004, China*

*<sup>3</sup> Key Laboratory for Microstructural Material Physics of Hebei Province, Yanshan University, Qinhuangdao 066004, China*

\*Correspondence should be addressed to: leisu2050@iccas.ac.cn

gqyang@iccas.ac.cn

zzhao@ysu.edu.cn

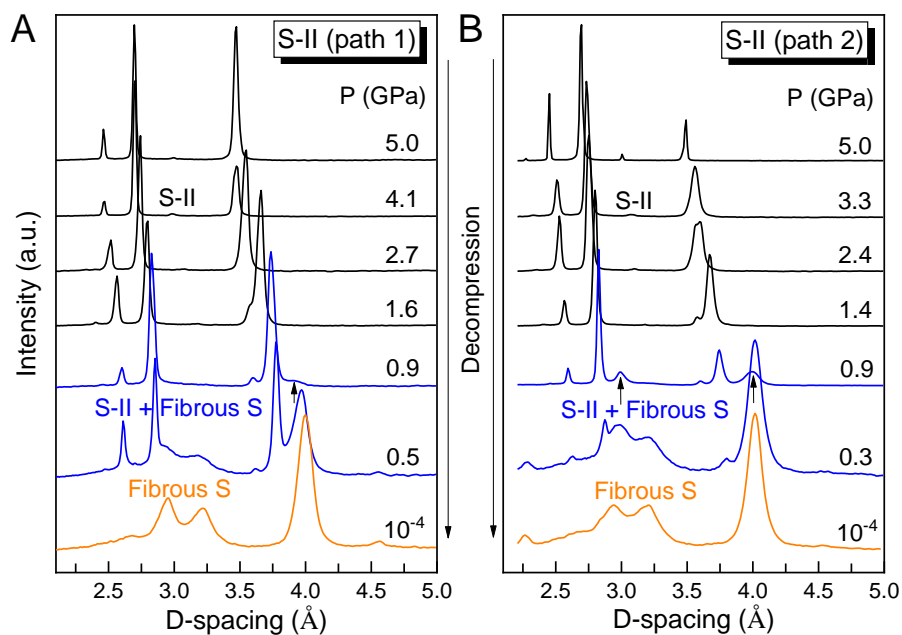

**Figure S1.** Change in synchrotron XRD patterns upon the decompression of S-II obtained along path 1 (A) and path 2 (B), respectively. Black arrows showed the emergence of fibrous S at about 0.9 GPa. After pressure release, the fibrous S can be recovered to ambient condition.

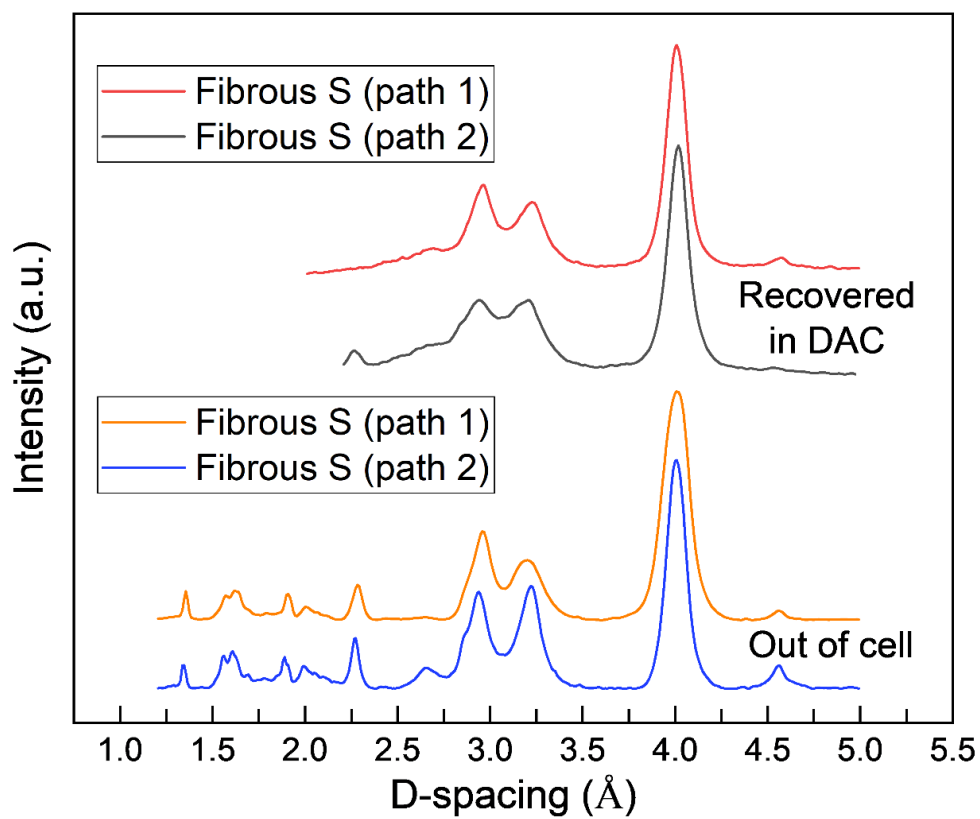

**Figure S2.** Diffraction patterns of fibrous S measured at ambient condition.
